# Supplementary material
Source: ML conference proceedings conference paper supplement (https://openreview.net/forum?id=BOACpkiXGu)

Cumulative Regret

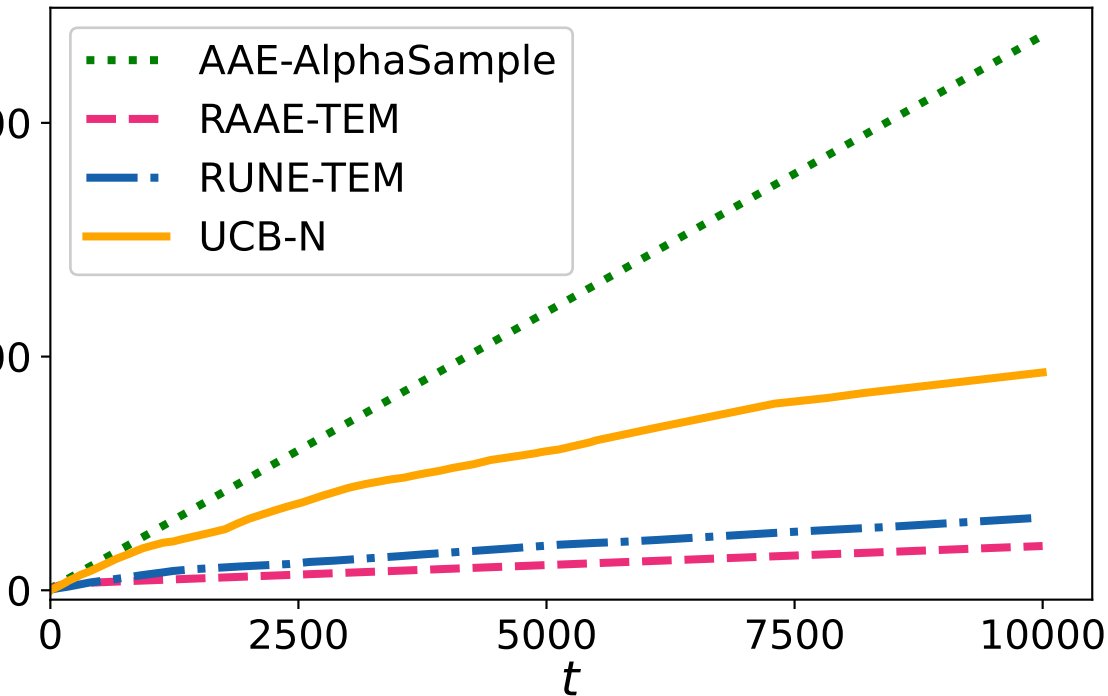

Supplement: supplementary_material [file attachment]

Cumulative Regret

1000

500

0

0

2500

5000

7500

10000

$t$

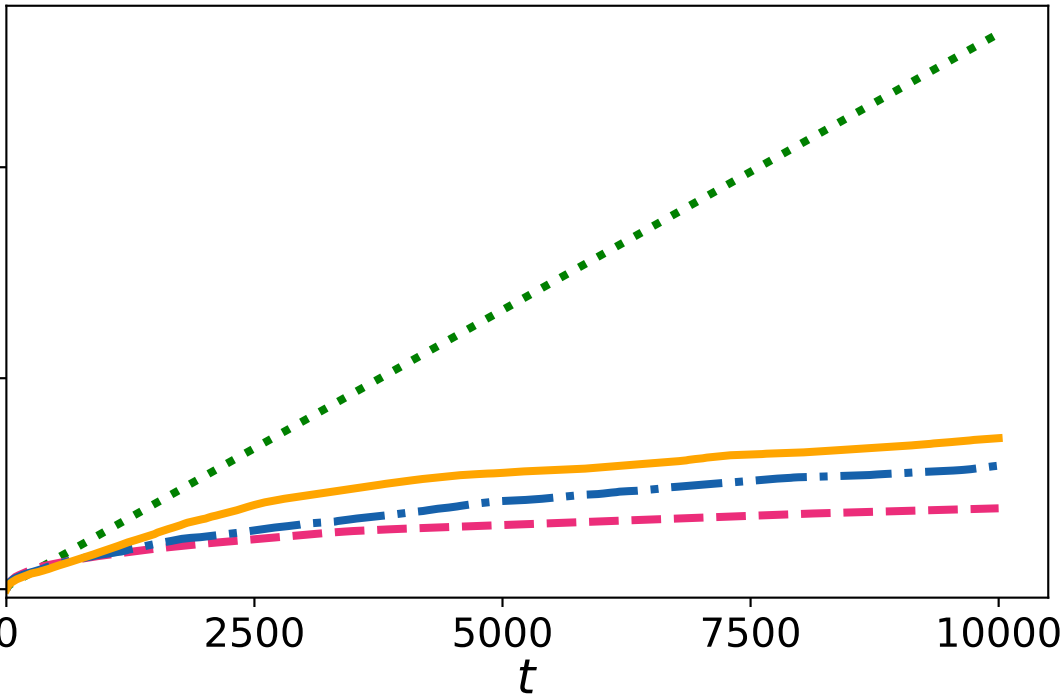

Supplement: supplementary_material [file attachment]

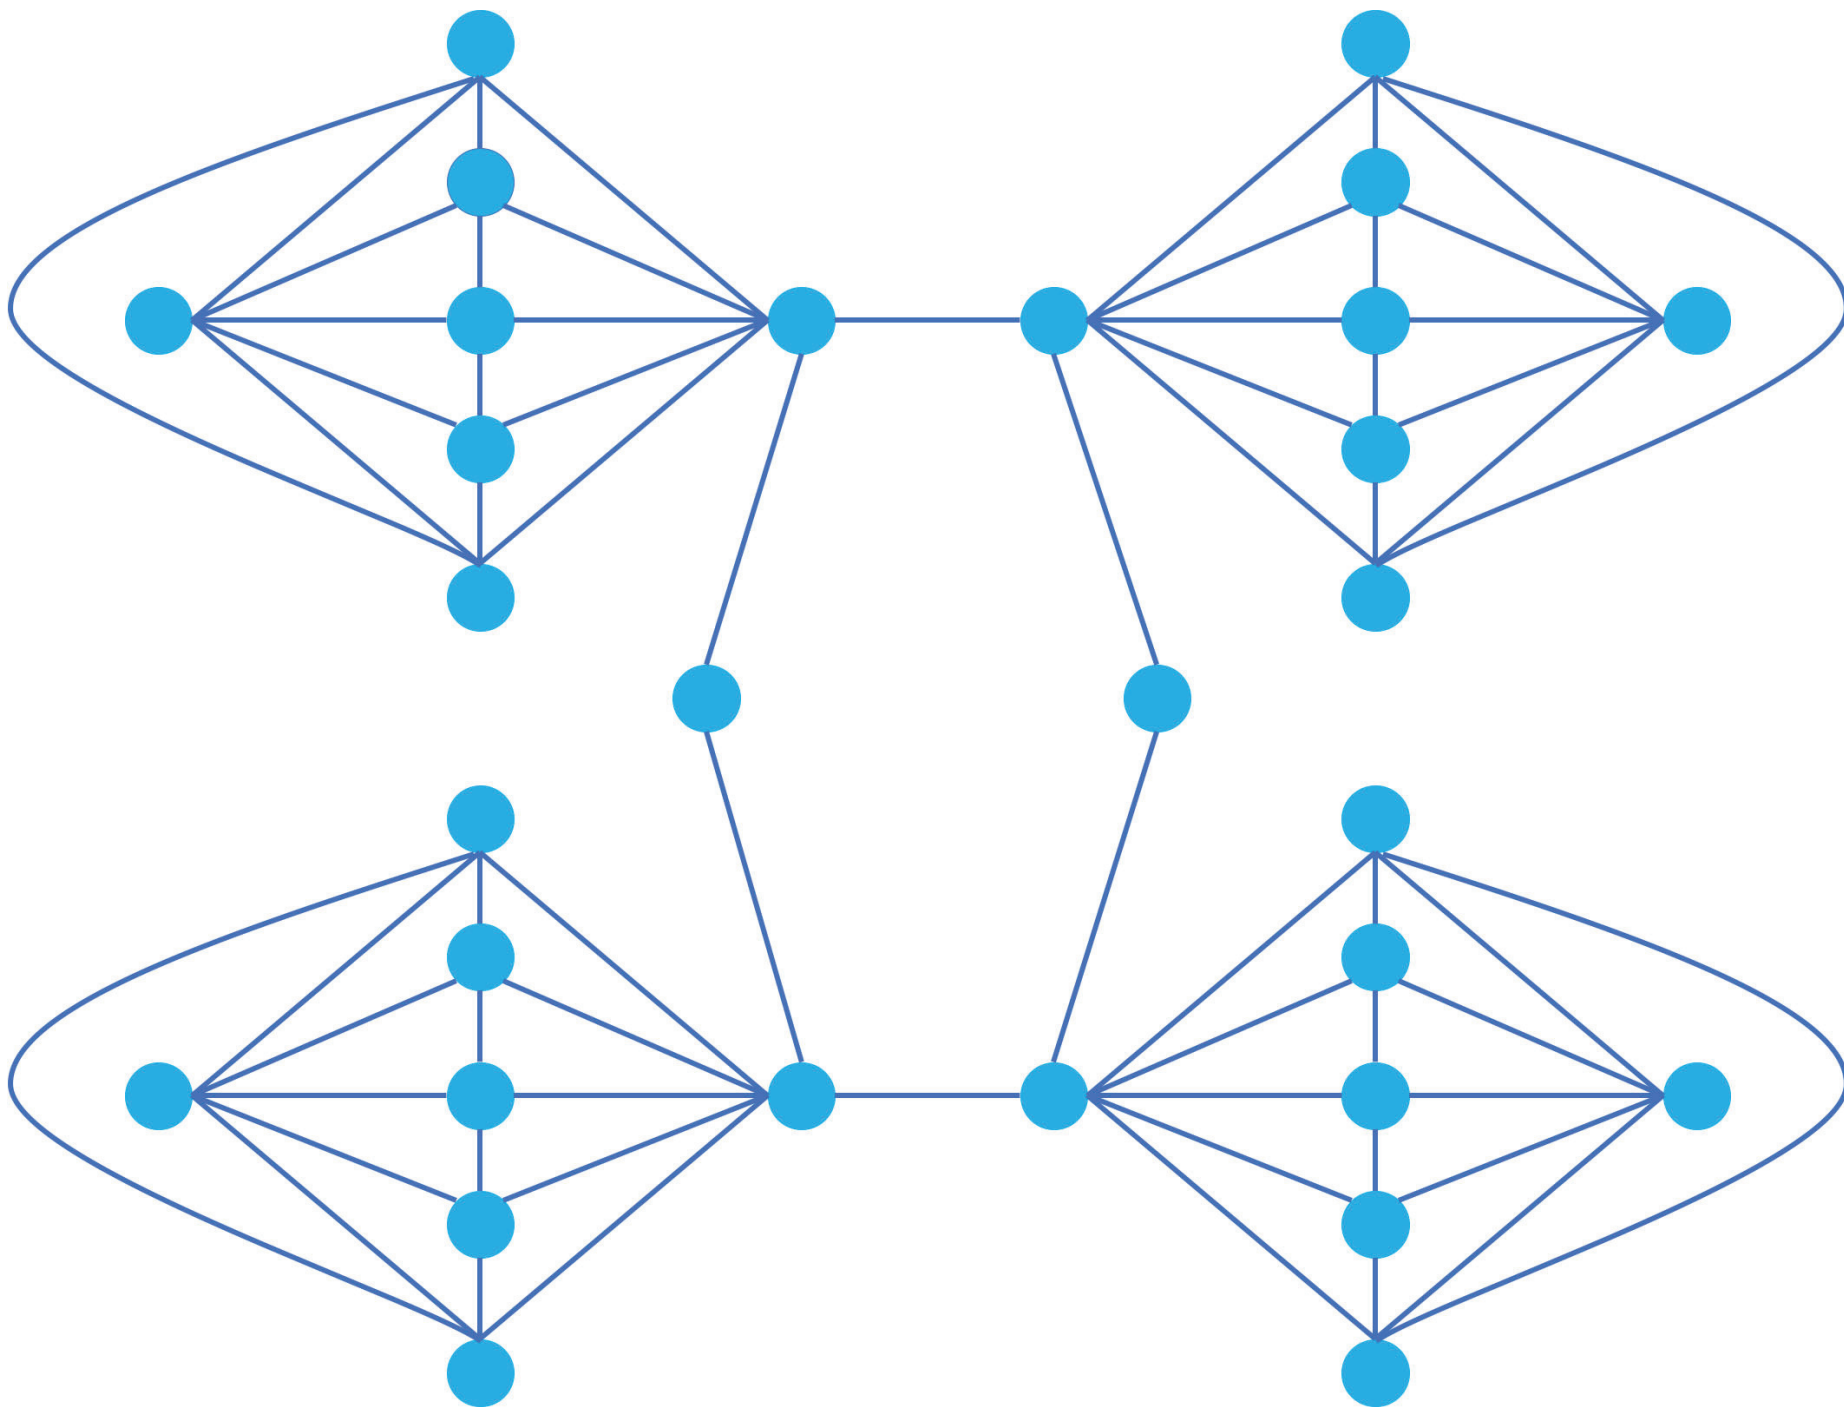

Supplement: supplementary_material [file attachment]
